## Correction: Posttranscriptional regulation of Galectin-3 by miR-128 contributes to colorectal cancer progression

**Weiqun Lu<sup>1,\*</sup>, Jia Wang<sup>1,\*</sup>, Guohua Yang<sup>1</sup>, Nanrong Yu<sup>1</sup>, Zhiliang Huang<sup>1</sup>, Houwei Xu<sup>1</sup>, Jianchang Li<sup>1</sup>, Jiliang Qiu<sup>1</sup>, Xiang Zeng<sup>1</sup>, Shicai Chen<sup>1</sup>, Nan Li<sup>1</sup> and Haiying Liu<sup>1</sup>**

<sup>1</sup> Department of Gastrointestinal Neoplasms Surgery, Affiliated Cancer Hospital & Institute of Guangzhou Medical University, Guangzhou 510095, Guangdong, China

\* These authors contributed equally to this work

**Published:** February 23, 2018

**Copyright:** Lu et al. This is an open-access article distributed under the terms of the Creative Commons Attribution License 3.0 (CC BY 3.0), which permits unrestricted use, distribution, and reproduction in any medium, provided the original author and source are credited.

**This article has been corrected:** The updated Acknowledgments and Funding information is provided below:

### ACKNOWLEDGMENTS AND FUNDING

This study was supported by grants from the National Natural Science Foundation of China (No. 81401989). Guangzhou Science and Technology Plan Projects (Health Medical Collaborative Innovation Program of Guangzhou) (No. 201400000001-4).

Original article: Oncotarget. 2017; 8:15242-15251. <https://doi.org/10.18632/oncotarget.14839>
